# Supplementary material
Source: HighWire-hosted journal article supplement (https://bmjopen.bmj.com/content/7/11/e018696)
Supplement: inline-supplementary-material-3 [file inline-supplementary-material-3.pdf]

**Appendix S3: Primary reasons for article exclusion (n = 35)**

|                  | <b>Population not postnatal</b>                         | <b>Intervention not targeted at management of BP</b>                                                        | <b>No control group</b>                                                                                                                                                                                                                                                                                                                                         | <b>Study design</b>                                              |
|------------------|---------------------------------------------------------|-------------------------------------------------------------------------------------------------------------|-----------------------------------------------------------------------------------------------------------------------------------------------------------------------------------------------------------------------------------------------------------------------------------------------------------------------------------------------------------------|------------------------------------------------------------------|
| <b>n</b>         | 4                                                       | 6                                                                                                           | 22                                                                                                                                                                                                                                                                                                                                                              | 3                                                                |
| <b>Study IDs</b> | Berks 2015<br>Gerard 1983<br>Scardo 1999<br>Wacker 2006 | Chandrasekaran 2015<br>Ehrenberg 2004<br>Ehrenberg 2006<br>Ossada 2016<br>Wasden 2012<br>Younger-Lewis 2016 | Al Waili 2004<br>Alicino 1962<br>Barton 1991<br>Belfort 1988<br>Belfort 1992<br>Bittle 2014<br>Bosio 2003<br>Correa 1982<br>Dulitzky 1987<br>Hirshberg 2016<br>Hirshberg 2017<br>Hunter 1961<br>Onishi 2015<br>Robinson 1964<br>Rodriguez 2012<br>Saghir<br>Smith 2005<br>Sukerman-Voldman 1985<br>Taslimi 1991<br>Tkacheva 2006<br>Wacker 1994<br>Walters 1984 | Editor, Emergency Medicine 1990<br>Cursino 2015<br>Gallegos 1961 |
