# Supplementary material
Source: HighWire-hosted journal article supplement (https://bmjopen.bmj.com/content/7/11/e018696)
Supplement: inline-supplementary-material-4 [file inline-supplementary-material-4.pdf]

## APPENDIX S4: Main characteristics of included studies (n=39)

| Author and year                                  | Methods                    |                                                         | Participants |                      |                            |         | Intervention                                                                                    |                                                                                                               |                                                                        | Outcomes                                                                                                                                                                                                      |  |
|--------------------------------------------------|----------------------------|---------------------------------------------------------|--------------|----------------------|----------------------------|---------|-------------------------------------------------------------------------------------------------|---------------------------------------------------------------------------------------------------------------|------------------------------------------------------------------------|---------------------------------------------------------------------------------------------------------------------------------------------------------------------------------------------------------------|--|
|                                                  | Study design               | Duration                                                | n*           | Age /y†              | Setting                    | Country | Intervention                                                                                    | Control(s)                                                                                                    | Primary                                                                | Secondary                                                                                                                                                                                                     |  |
| <b>ANTIHYPERTENSIVE MEDICATIONS (18 studies)</b> |                            |                                                         |              |                      |                            |         |                                                                                                 |                                                                                                               |                                                                        |                                                                                                                                                                                                               |  |
| <b>Calcium channel blockers</b>                  |                            |                                                         |              |                      |                            |         |                                                                                                 |                                                                                                               |                                                                        |                                                                                                                                                                                                               |  |
| Barton 1990 <sup>32</sup>                        | RCT                        | Enrolled immediately after birth<br>F/U 48h             | 31           | 24.0<br>26.3         | Tertiary referral hospital | USA     | Nifedipine 10mg PO 4-hourly for 48 hours                                                        | Placebo                                                                                                       | MAP                                                                    | SBP, DBP<br>Maternal heart rate<br>AHT requirement<br>Urine output<br>Laboratory values (urine protein, creatinine clearance, HCT, plt, ALT, BUN, creatinine, serum electrolytes, UA, urine specific gravity) |  |
| Vermillion 1999 <sup>21</sup>                    | RCT                        | Enrolled within 24h of birth<br>F/U 3 – 24h             | 21           | 27.2±7.3<br>27.0±6.4 | Tertiary referral hospital | USA     | Nifedipine 10mg stat PO then 20mg every 20min until BP <160/110mmHg or max 5 doses + IV placebo | Labetalol 20mg, then 40mg, then 80mg IV every 20min until BP <160/110mmHg or max 5 doses (300mg) + PO placebo | SBP + DBP                                                              | SBP (failure to achieve target <160mmHg)<br>DBP (failure to achieve target <110mmHg)<br>Maternal side effects<br>AHT requirement<br>Urine output                                                              |  |
| Sayin 2005 <sup>34</sup>                         | RCT                        | Enrolled 24h after birth<br>F/U 72h after BP controlled | 83           | 17-41                | Tertiary referral hospital | Turkey‡ | Nifedipine 10mg PO QDS until BP <150/100mmHg for 48h                                            | Methyldopa 250mg PO TDS                                                                                       | SBP + DBP                                                              | Maternal mortality<br>AHT requirement<br>Hypertensive retinopathy                                                                                                                                             |  |
| <b>Vasodilators</b>                              |                            |                                                         |              |                      |                            |         |                                                                                                 |                                                                                                               |                                                                        |                                                                                                                                                                                                               |  |
| Palot 1979 <sup>36</sup>                         | Retrospective cohort study | Not specified                                           | 54           | 24.5 (17-37)         | Not specified              | France‡ | Hydralazine 5mg IV stat then 1% IV infusion, furosemide 20mg IV stat and 30% hypertonic glucose | (1) Clonidine IV and furosemide 20mg IV stat<br>Or (2) Non-systematic treatment                               | Maternal morbidity (development of pre-eclampsia with severe features) | BP (time to resolution of hypertension)                                                                                                                                                                       |  |

**Abbreviations:** AHT = antihypertensive; ALT = alanine aminotransferase; BD = twice daily; BP = blood pressure; BUN = blood urea nitrogen; DBP = diastolic blood pressure; F/U = follow-up; IM = intramuscular; IV = intravenous; MAP = mean arterial pressure; plt = platelets; PN = postnatal; OD = once daily; PO = oral; QDS = four times daily; RCT = randomised controlled trial; SBP = systolic blood pressure; S/L = sublingual; TDS = three times daily; UA = uric acid

\* n = postnatal population (antenatal excluded)

† Where separate data available for study groups, intervention group listed first

‡ Non-English language manuscript

| Author and year                             | Methods                |                                                   | Participants |                          |                            |              | Intervention                                                                                                          |                                                                                                                                  |           | Outcomes                                                                                                                                                           |  |
|---------------------------------------------|------------------------|---------------------------------------------------|--------------|--------------------------|----------------------------|--------------|-----------------------------------------------------------------------------------------------------------------------|----------------------------------------------------------------------------------------------------------------------------------|-----------|--------------------------------------------------------------------------------------------------------------------------------------------------------------------|--|
|                                             | Study design           | Duration                                          | n*           | Age /y†                  | Setting                    | Country      | Intervention                                                                                                          | Control(s)                                                                                                                       | Primary   | Secondary                                                                                                                                                          |  |
| Griffis 1989 <sup>38</sup><br><sub>39</sub> | RCT                    | F/U 24h                                           | 26           | Not specified            | Tertiary referral hospital | USA          | Hydralazine 20mg IM QDS for 24h                                                                                       | Methyldopa 250mg IV QDS x 24h                                                                                                    | MAP       | Maternal side effects<br>AHT requirement<br>Urine output (time to diuresis)                                                                                        |  |
| Walss Rodriguez 1991 <sup>40</sup>          | RCT                    | Not specified                                     | 38           | 16-40                    | Not specified              | Mexico†      | Hydralazine 40mg PO QDS, duration not specified; if DBP >110mmHg PRN nifedipine 10mg SL every 30min, to max 3 doses   | Nifedipine 10mg SL every 30min if DBP ≥110mmHg                                                                                   | SBP       | DBP<br>AHT requirement                                                                                                                                             |  |
| Begum 2002 <sup>17</sup>                    | Quasi-randomised trial | Not specified                                     | 15           | 24.09±4.93<br>22.72±5.08 | Tertiary referral hospital | Bangladesh   | Hydralazine 5mg then 2mg IV bolus every 15min until DBP 90-95mmHg                                                     | Hydralazine 20mg/200ml normal saline IV infusion; 10 drops per min, increased by 5 drops at 15min intervals; until DBP 90-95mmHg | DBP       | Maternal side effects<br>AHT requirement<br>Maternal heart rate                                                                                                    |  |
| Vigil-De Gracia 2007 <sup>35</sup>          | RCT                    | Enrolled day 2-3 after birth<br>F/U not specified | 82           | 29.9±5.9<br>31.3±5.5     | Tertiary referral hospital | Panama       | Hydralazine 5mg IV every 20min until BP <160/110mmHg or max 5 doses                                                   | Labetalol 20mg, then 40mg, then 80mg IV every 20min until BP <160/110mmHg or max 5 doses (300mg)                                 | SBP + DBP | Maternal mortality<br>Maternal morbidity (development of pre-eclampsia with severe features)<br>Maternal side effects<br>AHT requirement<br>Maternal heart rate    |  |
| Hennessy 2007 <sup>23</sup>                 | RCT                    | F/U 3h                                            | 37           | 21-43 (mean 33)          | Tertiary referral hospital | Australia    | Diazoxide 15mg IV every min, maximum dose 300mg                                                                       | Hydralazine 5mg IV every 2min, maximum 15mg                                                                                      | SBP + DBP | SBP (10mmHg above target after 1 hour)<br>DBP (10mmHg above target after 1 hour)<br>Maternal side effects (including hypotension)<br>Time taken to administer drug |  |
| <b>Beta blockers</b>                        |                        |                                                   |              |                          |                            |              |                                                                                                                       |                                                                                                                                  |           |                                                                                                                                                                    |  |
| Garden 1982 <sup>24</sup>                   | RCT                    | Enrolled immediately after birth<br>F/U 45-64h    | 6            | 25-44<br>20-28           | Tertiary referral hospital | South Africa | Labetalol 200mg/200ml 5% dextrose, 20mg/h IV infusion, doubled every 30min until DBP <100mmHg or maximum dose 160mg/h | Dihydralazine 100mg/200ml 5% dextrose, 10mg/h IV infusion, doubled every 30min until DBP <100mmHg or maximum dose 80mg/h         | DBP       | Maternal side effects                                                                                                                                              |  |
| Fidler 1982 <sup>42</sup>                   | RCT                    | Enrolled 4 days after birth<br>F/U 9 days         | 80           | 29.7±1.0<br>27.8±0.9     | Tertiary referral hospital | UK           | Timolol 5mg PO TDS for 9 days                                                                                         | Methyldopa 250mg PO TDS for 9 days                                                                                               | DBP       | SBP<br>DBP (time to achieve control, proportion achieving control)<br>Maternal side effects                                                                        |  |

| Author and year                   | Methods                    |                                            | Participants |                      |                            |              | Intervention                                                                                                |                                                           |                                     | Outcomes                                                                                                                                                                                                                                        |  |
|-----------------------------------|----------------------------|--------------------------------------------|--------------|----------------------|----------------------------|--------------|-------------------------------------------------------------------------------------------------------------|-----------------------------------------------------------|-------------------------------------|-------------------------------------------------------------------------------------------------------------------------------------------------------------------------------------------------------------------------------------------------|--|
|                                   | Study design               | Duration                                   | n*           | Age /y†              | Setting                    | Country      | Intervention                                                                                                | Control(s)                                                | Primary                             | Secondary                                                                                                                                                                                                                                       |  |
| Mabie 1987 <sup>22</sup>          | RCT                        | Enrolled 1-96 hours after birth<br>F/U 3h  | 41           | 23.7±6.9<br>22.9±7.0 | Tertiary referral hospital | USA          | Labetalol 20mg IV every 10min then escalating until DBP <100mmHg or maximum cumulative dose reached (300mg) | Hydralazine 5mg IV every 10min until DBP <100mmHg         | MAP                                 | MAP (time to maximal decrease)<br>DBP (achieving target <100mmHg)<br>Maternal side effects<br>AHT requirement<br>Maternal heart rate                                                                                                            |  |
| Shumard 2016 <sup>41</sup>        | Retrospective cohort study | F/U not specified (but >24h)               | 128          | Not specified        | Not specified              | USA          | Labetalol PO (variable dose and frequency)                                                                  | Nifedipine PO (variable dose and frequency)               | Length of hospital stay after birth | SBP, DBP<br>AHT requirement                                                                                                                                                                                                                     |  |
| Sharma 2017 <sup>27, 28</sup>     | RCT                        | F/U not specified (but >24h)               | 50           | Not specified        | Tertiary referral hospital | USA          | Labetalol 200mg PO BD                                                                                       | Nifedipine XL 30mg PO OD                                  | SBP + DBP                           | Maternal side-effects<br>Length of PN hospital stay<br>AHT requirement                                                                                                                                                                          |  |
| <b>Other</b>                      |                            |                                            |              |                      |                            |              |                                                                                                             |                                                           |                                     |                                                                                                                                                                                                                                                 |  |
| Gaisin 2013 <sup>25</sup>         | RCT                        | 6 months                                   | 30           | 23-29                | Not specified (hospital)   | Russia       | Indapamide 1.5mg PO OD, duration unclear                                                                    | Adjusted dose methyldopa                                  | SBP + DBP                           | Safety data<br>Laboratory values (lipid and glucose metabolism)<br>Adherence to treatment<br>Weight reduction<br>Decrease in albuminuria<br>Decrease in LV mass index<br>Endothelial function<br>Milk production                                |  |
| Gaisin 2014 <sup>37</sup>         | RCT                        | 1 year                                     | 30           | 24-28                | Not specified (hospital)   | Russia       | Indapamide 1.5mg PO OD with ursodeoxycholic acid 250mg PO TDS, duration unclear                             | Adjusted dose methyldopa                                  | SBP + DBP                           | Maternal side effects<br>Laboratory values (atherogenic lipid profile, glucose metabolism, renal function)<br>Offspring adverse events<br>Weight reduction<br>Decrease in microalbuminuria<br>Decrease in LV mass index<br>Endothelial function |  |
| Krebs 1956 <sup>43,44</sup>       | Retrospective cohort study | F/U not specified (but >24h)               | 140          | Not specified        | Not specified              | Switzerland† | Reserpine 0.25mg PO or IM TDS or QDS for 7 days                                                             | Phenobarbital                                             | SBP + DBP                           | SBP + DBP (non-responders)<br>Maternal side effects<br>Resolution of albuminuria<br>Resolution of oedema                                                                                                                                        |  |
| Katz 2015 <sup>29-31</sup>        | RCT                        | F/U not specified                          | 90           | Not specified        | Tertiary referral hospital | Brazil       | Clonidine 0.1mg PO repeated every 20min to maximum 6 doses                                                  | Captopril 25mg PO repeated every 20min to maximum 6 doses | SBP + DBP                           | SBP (% reduction)<br>SBP + DBP (daily mean)<br>Maternal side effects<br>AHT requirement                                                                                                                                                         |  |
| <b>LOOP DIURETICS (3 studies)</b> |                            |                                            |              |                      |                            |              |                                                                                                             |                                                           |                                     |                                                                                                                                                                                                                                                 |  |
| Matthews 1997 <sup>46</sup>       | RCT                        | Enrolled 12-24h after birth<br>F/U 6 weeks | 19           | Not specified        | Tertiary referral hospital | UK           | Furosemide 40mg PO OD for 7 days                                                                            | Placebo                                                   | MAP                                 | Length of PN hospital stay<br>AHT requirement<br>Urine output<br>Laboratory values (hypokalemia)                                                                                                                                                |  |

| Author and year                   | Methods         |                                                       | Participants |                          |                            |         | Intervention                                                                                                                                            |                                   |           | Outcomes                                                                                                                                                                                       |  |
|-----------------------------------|-----------------|-------------------------------------------------------|--------------|--------------------------|----------------------------|---------|---------------------------------------------------------------------------------------------------------------------------------------------------------|-----------------------------------|-----------|------------------------------------------------------------------------------------------------------------------------------------------------------------------------------------------------|--|
|                                   | Study design    | Duration                                              | n*           | Age /y†                  | Setting                    | Country | Intervention                                                                                                                                            | Control(s)                        | Primary   | Secondary                                                                                                                                                                                      |  |
| Ascarelli 2005 <sup>16</sup>      | RCT             | Enrolled 2-24h after birth<br>F/U 6 weeks             | 264          | 22.8±6.1<br>22.9±6.0     | Tertiary referral hospital | USA     | Furosemide 20mg PO OD + potassium 20mEq PO OD for 5 days                                                                                                | No intervention                   | SBP       | Maternal morbidity (postnatal complication requiring intervention)<br>DBP<br>Length of PN hospital stay<br>AHT requirement<br>Maternal weight<br>Maternal HR<br>Duration of magnesium sulphate |  |
| Amorim 2015 <sup>45</sup>         | RCT             | Enrolled immediately after birth<br>F/U 5 days        | 120          | Not specified            | Tertiary referral hospital | Brazil  | Furosemide 40mg PO OD, duration not specified                                                                                                           | Placebo                           | SBP + DBP | MAP<br>SBP (daily episodes ≥180mmHg)<br>DBP (daily episodes ≥110mmHg)<br>Length of PN hospital stay<br>AHT requirement<br>Urine output<br>Maternal heart rate                                  |  |
| Veena 2017 <sup>19</sup>          | RCT             | Enrolled <24h after birth                             | 100          | 24.34±4.31<br>24.02±4.27 | Tertiary referral hospital | India   | Furosemide 20mg PO OD + nifedipine 10mg PO TDS for 3 days                                                                                               | Nifedipine 10mg PO TDS for 3 days | SBP + DBP | MAP<br>Maternal morbidity (postnatal complication requiring intervention)<br>Length of hospital stay after birth<br>Antihypertensive medication requirement<br>Urine output                    |  |
| <b>OTHER DRUGS (7 studies)</b>    |                 |                                                       |              |                          |                            |         |                                                                                                                                                         |                                   |           |                                                                                                                                                                                                |  |
| <b>Selective 5-HT antagonists</b> |                 |                                                       |              |                          |                            |         |                                                                                                                                                         |                                   |           |                                                                                                                                                                                                |  |
| Weiner 1982 <sup>48</sup>         | RCT (crossover) | F/U not specified                                     | 5            | Not specified            | Tertiary referral          | USA     | R41468 IV (dose not specified) bolus then infusion for 90min                                                                                            | Placebo                           | MAP       | MAP (rate at which hypertension returned post-infusion)<br>Urine output (infusion related diuresis)                                                                                            |  |
| Weiner 1984 <sup>49</sup>         | RCT (crossover) | Enrolled immediately after birth<br>F/U 3.5h          | 20           | 28±6.4                   | Tertiary referral          | USA     | Ketanserin 10mg IV bolus then 4mg/hr IV infusion. Repeat bolus after 5min if no response.                                                               | Placebo                           | SBP + DBP | Maternal side effects<br>DBP (target <95mmHg)<br>MAP<br>AHT requirement<br>Response rate                                                                                                       |  |
| Montenegro 1985 <sup>50</sup>     | RCT (crossover) | Enrolled immediately after birth<br>F/U not specified | 30           | 21.5 (13-31)             | Tertiary referral hospital | USA     | Ketanserin 10mg IV bolus, repeated if no response. If no response to second bolus IV infusion 4mg/hr (increments of 2mg/hr every 10min to max 12mg/hr). | Placebo                           | MAP       | Maternal side effects                                                                                                                                                                          |  |

| Author and year                      | Methods                    |                                                                 | Participants |                                  |                            |          | Intervention                                            |                                           |                                               | Outcomes                                                                                                                                                                                                                                                                                                                                                              |  |
|--------------------------------------|----------------------------|-----------------------------------------------------------------|--------------|----------------------------------|----------------------------|----------|---------------------------------------------------------|-------------------------------------------|-----------------------------------------------|-----------------------------------------------------------------------------------------------------------------------------------------------------------------------------------------------------------------------------------------------------------------------------------------------------------------------------------------------------------------------|--|
|                                      | Study design               | Duration                                                        | n*           | Age /y†                          | Setting                    | Country  | Intervention                                            | Control(s)                                | Primary                                       | Secondary                                                                                                                                                                                                                                                                                                                                                             |  |
| <b>Alternative therapies</b>         |                            |                                                                 |              |                                  |                            |          |                                                         |                                           |                                               |                                                                                                                                                                                                                                                                                                                                                                       |  |
| Hladunewich 2006 <sup>51</sup>       | RCT                        | Enrolled immediately after birth F/U 10 days                    | 45           | 29±6<br>28±7                     | Tertiary referral hospital | USA      | L-arginine 3.5g PO QDS or 10g IV TDS for 3-9 days       | Placebo                                   | MAP                                           | Maternal side effects<br>SBP, DBP<br>AHT requirement<br>Laboratory values (glomerular filtration rate (GFR) (inulin clearance), Albumin/creatinine (A/C) ratio, vasoactive hormones (NO and cGMP), liver function tests (LFTs), plt)<br>Renal plasma flow (para-amino hippurate clearance), renal blood flow = renal plasma flow / (1 - HCT), renovascular resistance |  |
| Liu 2009 <sup>52</sup>               | Quasi-randomised trial     | Enrolled day 2 after birth F/U 3 weeks                          | 72           | 26.6±3.7<br>25.7±3.9             | District general hospital  | China†   | Shengkangbao 10g PO or IV BD for 3 weeks                | No intervention                           | Percentage of cases with positive albuminuria | SBP, DBP<br>Laboratory values (24h urinary albumin, plasma total protein, plasma albumin, urinary albumin negative inversion rate, renal function)                                                                                                                                                                                                                    |  |
| <b>Steroids</b>                      |                            |                                                                 |              |                                  |                            |          |                                                         |                                           |                                               |                                                                                                                                                                                                                                                                                                                                                                       |  |
| Barrilleaux 2005 <sup>53,54</sup>    | RCT                        | Enrolled immediately after birth F/U 4.5 days                   | 157 (175)    | 24.5±6.8<br>23.9±6.4             | Tertiary referral hospital | USA      | Dexamethasone 10mg x 2, then 5mg x 2 IV BD for 48 hours | Placebo                                   | Antihypertensive medication requirement       | MAP<br>Critical care admission<br>Length of PN hospital stay<br>Urine output<br>Laboratory values (plt, lactate dehydrogenase (LDH), aspartate aminotransferase (AST))<br>Stay in recovery >24h                                                                                                                                                                       |  |
| <b>Atrial natriuretic peptide</b>    |                            |                                                                 |              |                                  |                            |          |                                                         |                                           |                                               |                                                                                                                                                                                                                                                                                                                                                                       |  |
| Shigemitsu 2015 <sup>47</sup>        | Retrospective cohort study | F/U not specified                                               | 16           | Not specified                    | Tertiary referral hospital | Japan    | Carperitide (no further details)                        | Standard care                             | MAP                                           | Maternal mortality<br>Maternal side effects<br>Need for dialysis<br>Time to diuresis                                                                                                                                                                                                                                                                                  |  |
| <b>UTERINE CURETTAGE (8 studies)</b> |                            |                                                                 |              |                                  |                            |          |                                                         |                                           |                                               |                                                                                                                                                                                                                                                                                                                                                                       |  |
| Salvatore 1967 <sup>58</sup>         | Prospective cohort study   | Enrolled immediately after birth F/U 10 days                    | 48           | 16-45                            | Tertiary referral hospital | Brazil†† | Uterine curettage                                       | No intervention                           | SBP + DBP                                     | Maternal morbidity (development of pre-eclampsia with severe features – seizures)                                                                                                                                                                                                                                                                                     |  |
| Magann 1993 <sup>59</sup>            | RCT                        | Enrolled immediately after birth F/U 24h (telephone at 7 weeks) | 32           | 22.9±5.6<br>23.4±6.6             | Tertiary referral hospital | USA      | Uterine curettage                                       | No intervention                           | MAP                                           | Maternal side effects<br>Length of PN hospital stay<br>AHT requirement<br>Urine output<br>Laboratory values (HCT, plt, AST, LDH)                                                                                                                                                                                                                                      |  |
| Magann 1994 <sup>60</sup>            | RCT                        | Enrolled immediately after birth F/U 48h (telephone at 7 weeks) | 45           | 22.3±6.4<br>22.8±6.6<br>22.8±6.1 | Tertiary referral hospital | USA      | Uterine curettage                                       | (1) Nifedipine PO<br>OR<br>(2) Usual care | MAP                                           | Maternal side effects<br>Urine output<br>Laboratory values (HCT, plt, AST, LDH)                                                                                                                                                                                                                                                                                       |  |

| Author and year                         | Methods                    |                                                    | Participants    |                      |                            |         | Intervention                                                                                                                                                                  |                 |                                                           | Outcomes                                                                                                                                                                              |  |
|-----------------------------------------|----------------------------|----------------------------------------------------|-----------------|----------------------|----------------------------|---------|-------------------------------------------------------------------------------------------------------------------------------------------------------------------------------|-----------------|-----------------------------------------------------------|---------------------------------------------------------------------------------------------------------------------------------------------------------------------------------------|--|
|                                         | Study design               | Duration                                           | n*              | Age /y†              | Setting                    | Country | Intervention                                                                                                                                                                  | Control(s)      | Primary                                                   | Secondary                                                                                                                                                                             |  |
| Gocmen 1996 <sup>57</sup>               | Prospective cohort study   | Enrolled immediately after birth F/U 24h           | 50              | Not specified        | Tertiary referral hospital | Turkey† | Uterine curettage                                                                                                                                                             | No intervention | MAP                                                       | Urine output<br>Laboratory values (plt)                                                                                                                                               |  |
| Gomez 2005 <sup>61</sup>                | RCT                        | Enrolled immediately after birth F/U not specified | 86              | Not specified        | Tertiary referral hospital | Peru    | Uterine curettage                                                                                                                                                             | No intervention | MAP                                                       | Maternal side effects<br>Length of PN hospital stay<br>AHT requirement<br>Urine output                                                                                                |  |
| Alkan 2006 <sup>62</sup>                | RCT                        | Enrolled immediately after birth F/U 24h           | 56              | 22.8±3.4<br>24.6±7.5 | Tertiary referral hospital | Turkey  | Uterine curettage                                                                                                                                                             | No intervention | MAP                                                       | Maternal side effects<br>Urine output<br>Laboratory values (plt, LDH, AST, ALT)                                                                                                       |  |
| Ragab 2013 <sup>15</sup>                | RCT                        | Enrolled immediately after birth F/U 96h           | 420             | Not specified        | Tertiary referral hospital | Egypt   | Uterine curettage                                                                                                                                                             | No intervention | MAP                                                       | Maternal mortality<br>Maternal morbidity (development of pre-eclampsia with severe features)<br>MAP (time to MAP ≤105mmHg)<br>Urine output<br>Laboratory values (creatinine, plt, UA) |  |
| Mallapur 2015 <sup>18</sup>             | RCT                        | Enrolled immediately after birth F/U 7 days        | 100             | Not specified        | Tertiary referral hospital | India   | Uterine curettage                                                                                                                                                             | No intervention | MAP                                                       | Length of PN hospital stay<br>Urine output<br>Laboratory values (plt, renal and liver function)                                                                                       |  |
| <b>ORGANISATION OF CARE (2 studies)</b> |                            |                                                    |                 |                      |                            |         |                                                                                                                                                                               |                 |                                                           |                                                                                                                                                                                       |  |
| York 1997 <sup>26</sup>                 | RCT                        | Enrolled immediately after birth F/U 8 weeks       | 96 <sup>§</sup> | 28±7<br>27±7         | Tertiary referral          | USA     | Contact with nurse specialist; early discharge if criteria met; 2 scheduled home visits and 10 telephone calls (twice weekly for 2 weeks, then weekly for 6 weeks) during F/U | Standard care   | Postnatal readmission to secondary care                   | Functional status<br>Patient satisfaction<br>Neonatal rehospitalisation / acute neonatal care<br>Cost                                                                                 |  |
| Bibbo 2014 <sup>33</sup>                | Retrospective cohort study | F/U not specified (but >7 days)                    | 138             | Not specified        | Tertiary referral hospital | USA     | Specialised postpartum clinic                                                                                                                                                 | Usual care      | Postnatal readmission to secondary care and triage visits | Primary care provider F/U                                                                                                                                                             |  |

§ Mixture of hypertension and diabetes – unable to separate
